# Supplementary material for: Secreted Frizzled-Related Protein 1 as a Biomarker against Incomplete Age-Related Lobular Involution and Microcalcifications’ Development
Source: PubMed Central journal article supplement (PMC7565692; doi:10.3390/cancers12092693), 2020-09-21
Supplement: cancers-12-02693-s001.pdf [file cancers-12-02693-s001.pdf]

**Table S1.** Association between SFRP1 expression (binary variable) and the degree of lobular involution.

| Binary scores                                                                                            | All ( <i>n</i> = 162) |                 | Premenopausal ( <i>n</i> = 82) |                 | Postmenopausal ( <i>n</i> = 80) |                 |
|----------------------------------------------------------------------------------------------------------|-----------------------|-----------------|--------------------------------|-----------------|---------------------------------|-----------------|
|                                                                                                          | OR (95% CI)           | <i>p</i> -value | OR (95% CI)                    | <i>p</i> -value | OR (95% CI)                     | <i>p</i> -value |
| SFRP1 expression                                                                                         | 0.28<br>(0.14–0.55)   | 0.00024         | 0.17<br>(0.060–0.45)           | 0.00048         | 0.44<br>(0.16–1.2)              | 0.11            |
| SFRP1 expression adjusted for age at mastectomy                                                          | 0.25<br>(0.12–0.50)   | 0.00018         | 0.18<br>(0.06–0.47)            | 0.00068         | 0.35<br>(0.10–0.99)             | 0.0080          |
| SFRP1 expression adjusted for menopausal status                                                          | 0.27<br>(0.13–0.54)   | 0.00028         |                                |                 |                                 |                 |
| SFRP1 expression adjusted for age at mastectomy, waist circumference and presence of microcalcifications | 0.25<br>(0.11–0.52)   | 0.00030         | 0.17<br>(0.060–0.48)           | 0.00098         | 0.30<br>(0.09–0.92)             | 0.044           |

Abbreviations: OR, odds ratio; CI, confidence interval; SFRP1, secreted frizzled-related protein 1. The *p*-value < 0.05 is considered significant.

**Table S2.** Histopathological characteristics of the study population.

| Characteristics   | All<br>(n = 162) | Premenopausal<br>(n = 82) | Postmenopausal<br>(n = 80) |
|-------------------|------------------|---------------------------|----------------------------|
| Histological type |                  |                           |                            |
| Ductal, in-situ   | 16 (10%)         | 9 (11%)                   | 7 (9%)                     |
| Ductal, invasive  | 121 (75%)        | 67 (82%)                  | 54 (67%)                   |
| Lobular, invasive | 15 (9%)          | 4 (5%)                    | 11 (14%)                   |
| Others *          | 10 (6%)          | 2 (2%)                    | 8 (10%)                    |
| Tumor grade       |                  |                           |                            |
| Non-assessed      | 26 (16%)         | 11 (13%)                  | 15 (19%)                   |
| I                 | 29 (18%)         | 15 (18%)                  | 14 (17%)                   |
| II                | 65 (40%)         | 35 (43%)                  | 30 (38%)                   |
| III               | 42 (26%)         | 21 (26%)                  | 21 (26%)                   |
| ER status         |                  |                           |                            |
| Positive          | 146 (90%)        | 75 (91%)                  | 71 (89%)                   |
| Negative          | 16 (10%)         | 7 (9%)                    | 9 (11%)                    |
| PR status         |                  |                           |                            |
| Positive          | 136 (84%)        | 75 (91%)                  | 61 (76%)                   |
| Negative          | 26 (16%)         | 7 (9%)                    | 19 (24%)                   |
| HER2 status       |                  |                           |                            |
| Not evaluated     | 28 (17%)         | 11 (13%)                  | 17 (21%)                   |
| Positive          | 18 (11%)         | 8 (10%)                   | 10 (13%)                   |
| Negative          | 116 (72%)        | 63 (77%)                  | 53 (66%)                   |

ER = estrogen receptor, PR = progesterone receptor, HER2 = human epidermal growth factor 2. \* Includes mucinous, tubular, adenoid cystic, and metaplastic carcinomas.

**Table S3.** Primer sequences and gene description.

| Gene Symbol   | Description                                                                                          | GenBank   | Size (pb) | Primer Sequence 5'→3'<br>Sens/Antisens               |
|---------------|------------------------------------------------------------------------------------------------------|-----------|-----------|------------------------------------------------------|
| <i>HPRT1</i>  | Homo sapiens hypoxanthine phosphoribosyltransferase 1                                                | NM_000194 | 157       | AGTTCTGTGGCCATCTGCTTAGTAG/AA ACAACAATCCGCCCAAAGG     |
| <i>GAPDH</i>  | Homo sapiens glyceraldehyde-3-phosphate dehydrogenase                                                | NM_002046 | 194       | GGCTCTCCAGAACATCATCCCT/ACGCC TGCTTCACCACCTTCTT       |
| <i>ADNg</i>   | Homo sapiens 3-beta-hydroxysteroid dehydrogenase/delta-5-delta-4-isomerase (3beta-HSD) gene (intron) | M38180    | 260       | GAAGGGCAGAGGTGGAAGTAGAA/AAC<br>AAAGACCAAAGACCAGTGAGA |
| <i>Leptin</i> | Homo sapiens leptin (LEP)                                                                            | NM_000230 | 64        | TTTTGTCAAGTGTCATATGTAGGTGTC/CTCCCTTCTGCCCAAACATTC    |
| <i>IL-6</i>   | Homo sapiens interleukin 6 (interferon, beta 2)                                                      | NM_000600 | 70        | CTGGTGTTCCTGCTGCCTTC/GTGGGG CGGCTACATCTTTGG          |
| <i>TNFα</i>   | Homo sapiens tumor necrosis factor                                                                   | NM_000594 | 85        | CATCAAGAGCCCCTGCCAGAG/GAAGA CCCCTCCCAGATAGATG        |
| <i>ATP5O</i>  | Homo sapiens ATP synthase, H <sup>+</sup> transporting, mitochondrial F1 complex, O subunit          | NM_001697 | 103       | ATTGAAGGTCGCTATGCCACAG/CCTTC AGGATTTGTGCTACTCTCA     |
| <i>G6PD</i>   | Homo sapiens glucose-6-phosphate dehydrogenase (G6PD), nuclear gene encoding mitochondrial protein   | NM_000402 | 77        | GCCAACCGCCTCTTCTACCTG/ATGCAG GACTCGTGAATGTTCTTG      |
